# Supplementary material
Source: Research Square preprint supplement (doi:10.21203/rs.3.rs-7920451/v1)
Supplement: Supplementary file 1 [file 66be366f9fec1d29ebc9ad8b.docx]

**Appendix**

**Appendix Table 1** Key Variablesand Measurement Items

| Variables | | Numbers | Measurement Items | Description of the Measuring |
| --- | --- | --- | --- | --- |
| Faculty Well-being | life well-being | 1 | My life is very interesting. | Each item was rated on a 7-point Likert scale:  1 = Strongly Disagree,  2 = Disagree,  3 = Somewhat Disagree,  4 = Neutral,  5 = Somewhat Agree,  6 = Agree,  7 = Strongly Agree. |
| 2 | I'm satisfied with my own life. |
| 3 | My living conditions are very good. |
| 4 | If there were an afterlife, I would hardly change my current way of life. |
| 5 | Most aspects of my life are very close to my ideals. |
| 6 | I really enjoy having in-depth communication with my family or friends and getting to know each other. |
| workplace well-being | 1 | My work is very interesting. |
| 2 | Overall, I'm very satisfied with the work I do. |
| 3 | I can always find ways to enrich my work. |
| 4 | I'm basically satisfied with the specific content of my work. |
| 5 | For me, work is a very meaningful experience. |
| 6 | I'm basically satisfied with the sense of accomplishment I get from my current work. |
| psychological well-being | 1 | Overall, I affirm myself and have full confidence in myself. |
| 2 | I handle daily life well. |
| 3 | People think I'm willing to give and share my time with others. |
| 4 | I'm good at arranging my time flexibly to get all my work done. |
| 5 | Most of the time, I have moments of true happiness. |
| 6 | As time goes by, I feel I've grown a lot. |
| Organizational Support | Organizational emotional support | 1 | My institution cares about my opinion | Each item was rated on a 5-point Likert scale: 1 = Strongly Disagree, 2 = Disagree, 3 = Neutral, 4 = Agree, 5 = Strongly Agree. |
| 2 | My institution cares about my well - being. |
| 3 | My institution will appreciate any extra effort I make. |
| 4 | My institution will ignore any complaints I make. |
| 5 | Even if I do my best work, my institution won't notice. |
| 6 | My institution cares about my overall job satisfaction. |
| 7 | My institution rarely cares about me. |
| 8 | My institution is proud of my achievements at work. |
| Organizational resource support | 1 | access to professional development funding | Faculty members rated the difficulty of accessing organizational resource support within their institutions using a 4-point ordered categorical scale: 1 = Difficult, 2 = Somewhat Difficult, 3 = Somewhat Easy, 4 = Easy. |
| 2 | Computer, equipment and technical support. |
| 3 | Clerical and secretarial support. |
| 4 | Support related to student counseling work. |
| 5 | Support related to community service. |
| Work-Family Conflict | | 1 | My work leaves no family time. | Each item was assessed using a 7-point Likert scale: 1 = Strongly Oppose, 2 = Somewhat Oppose, 3 = Slightly Oppose, 4 = Neither Oppose nor Agree, 5 = Slightly Agree, 6 = Somewhat Agree, 7 = Strongly Agree. |
| 2 | I am too exhausted to do housework after work. |
| 3 | Long working hours often prevent me from taking care of my family. |
| 4 | When I get home from work, I'm often too exhausted to fulfill my family obligations. |
| 5 | I often work overtime and can't do much housework when I get home. |
| 6 | When I get home from work, I'm too tired to do any housework. |
| Organizational Identification | | 1 | When someone praises our institution, it feels like a personal compliment. | Each item was rated on a 5-point Likert scale: 1 = Strongly Disagree, 2 = Disagree, 3 = Neutral, 4 = Agree, 5 = Strongly Agree. |
| 2 | I am interested in how others view our institution. |
| 3 | When someone criticizes our institution, it feels like a personal insult. |
| 4 | When I talk about my institution, I usually say 'we' instead of 'they'. |
| 5 | The institution’s success is my success. |
| 6 | If media reports criticize our institution, I'll feel embarrassed. |
